# Supplementary material for: Halogen doping of p-type inorganic hole transport layer: electronic nature-based dopant engineering for modulating hole selectivity in inverted planar perovskite solar cells
Source: Royal Society of Chemistry journal article supplement (doi:10.1039/d4tc00867g), 2024-01-01
Supplement: d4tc00867g1.pdf [file d4tc00867g1.pdf]

## **Supporting Information**

# **Halogen Doping of p-type Inorganic Hole Transport Layer: Electronic Nature Based Dopant Engineering for Modulating Hole Selectivity in Inverted Planar Perovskite Solar Cells**

*Vidya Sudhakaran Menon<sup>a</sup>, Saraswathi Ganesan<sup>a</sup>, Rohith Kumar Raman<sup>b</sup>, Ananthan Alagumalai<sup>a</sup>, Ananthanarayanan Krishnamoorthy<sup>a\*</sup>*

<sup>a</sup>Organic and Perovskite Photovoltaics Laboratory (OPPV), Department of Chemistry, SRM Institute of Science and Technology, Kattankulathur, Tamil Nadu, India, Pin Code-603203.

<sup>b</sup>Department of Physics and Nanotechnology, SRM Institute of Science and Technology, Kattankulathur, Tamil Nadu, India, Pin Code-603203.

E-mail: [ananthak@srmist.edu.in](mailto:ananthak@srmist.edu.in)

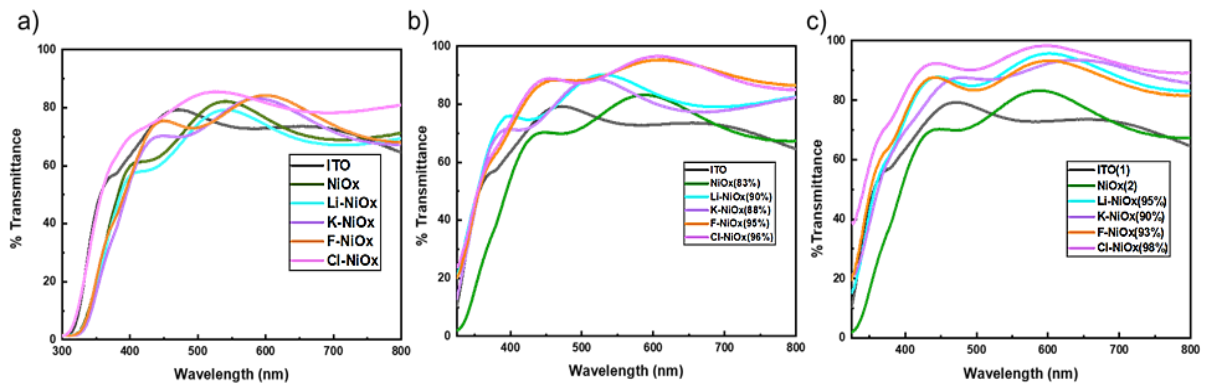

**Figure S1.** % Transmittance plots of a) 10 wt. % doped b) 3 wt. % doped and c) 1 wt. % doped  $\text{NiO}_x$  thin films.

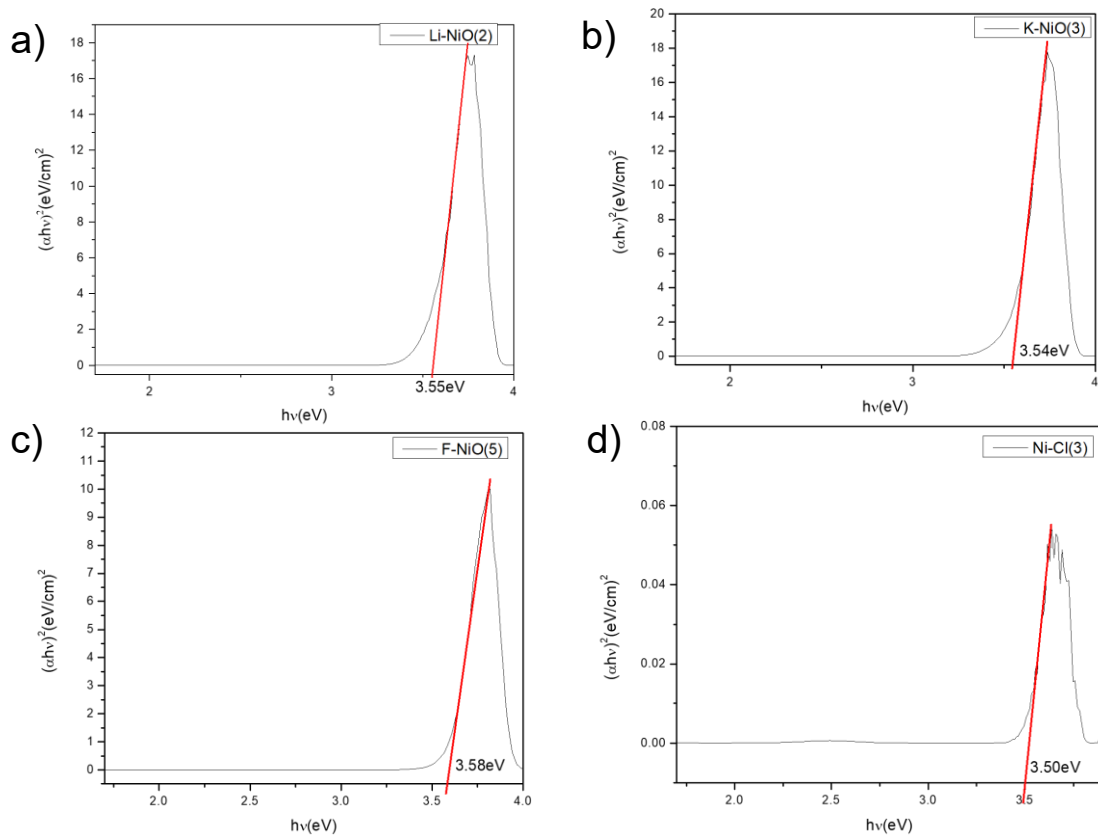

**Figure S2.** Tauc plot of 10 wt. % doped a)  $\text{Li:NiO}_x$  b)  $\text{K:NiO}_x$  c)  $\text{F:NiO}_x$  and d)  $\text{Cl:NiO}_x$ .

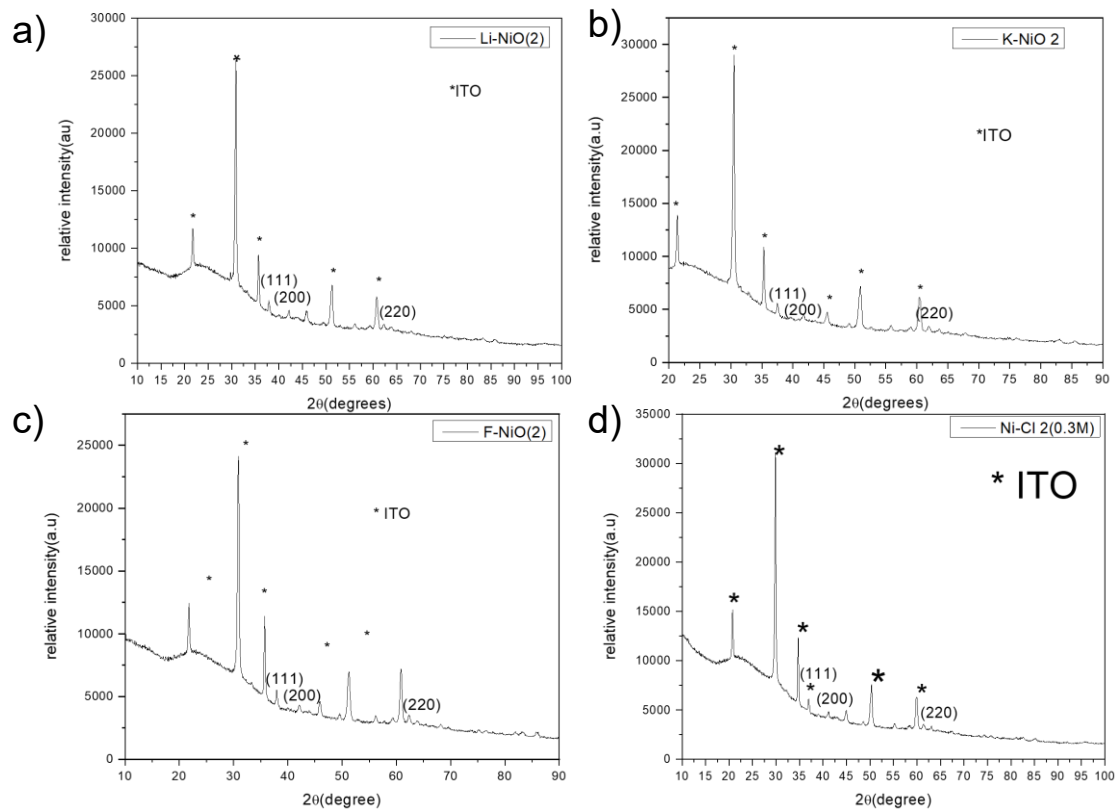

**Figure S3.** XRD plot of 10 wt. % doped a) Li:NiO<sub>x</sub> b) K:NiO<sub>x</sub> c) F:NiO<sub>x</sub> and d) Cl:NiO<sub>x</sub>.

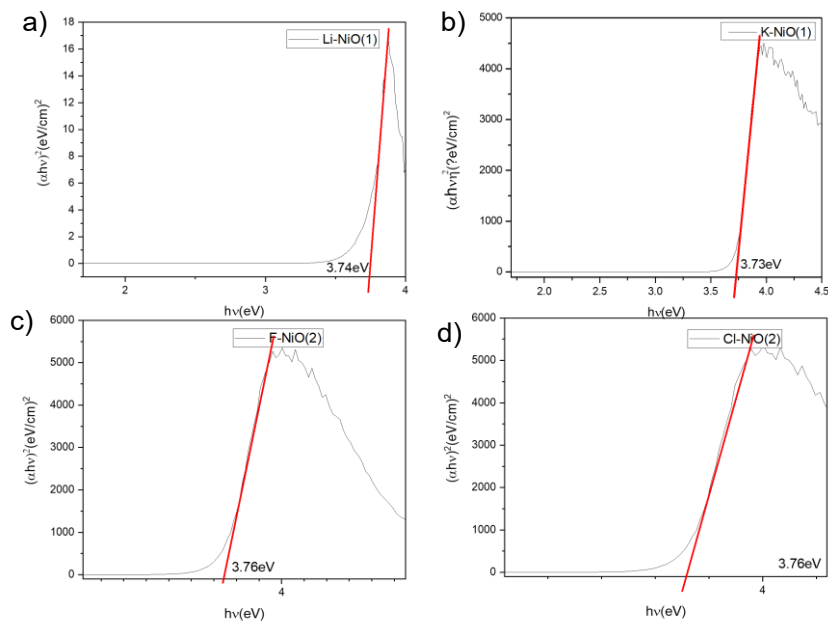

**Figure S4.** Tauc plot of 3 wt. % doped a) Li:NiO<sub>x</sub> b) K:NiO<sub>x</sub> c) F:NiO<sub>x</sub> and d) Cl:NiO<sub>x</sub>.

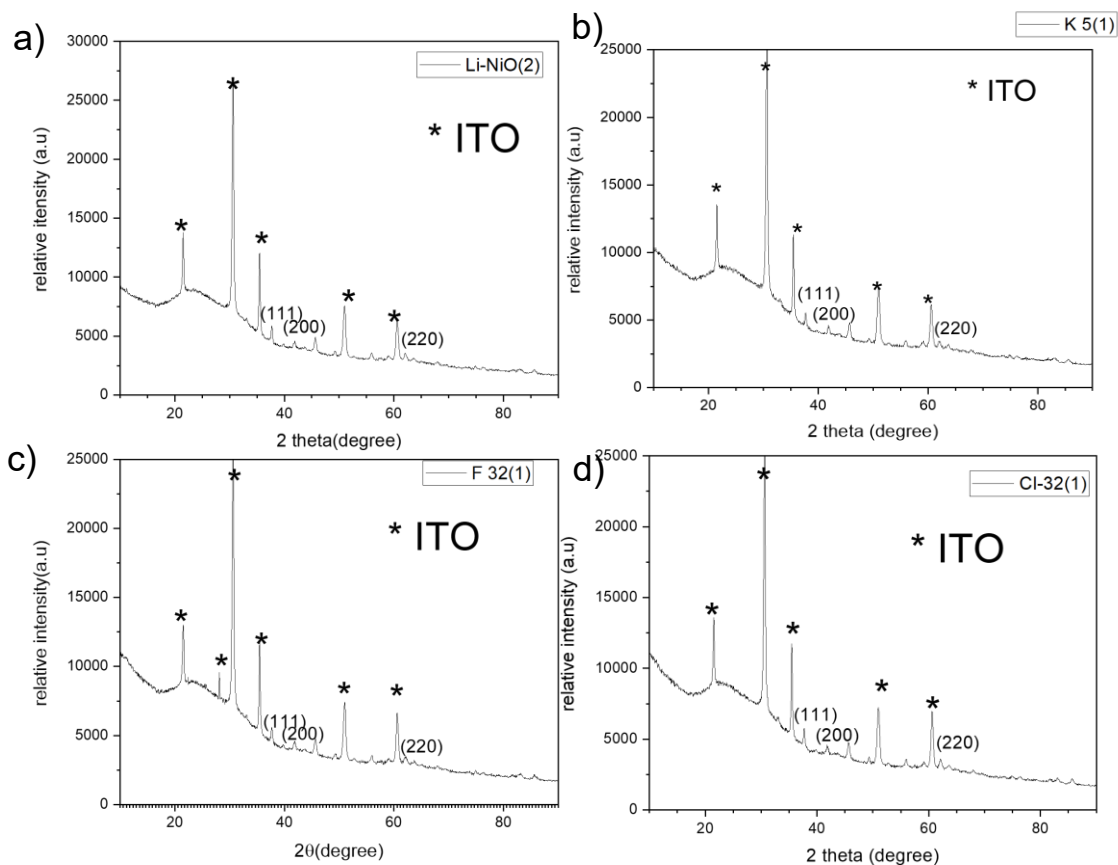

**Figure S5.** XRD plot of 3 wt. % doped a) Li:NiO<sub>x</sub> b) K:NiO<sub>x</sub> c) F:NiO<sub>x</sub> and d) Cl:NiO<sub>x</sub>.

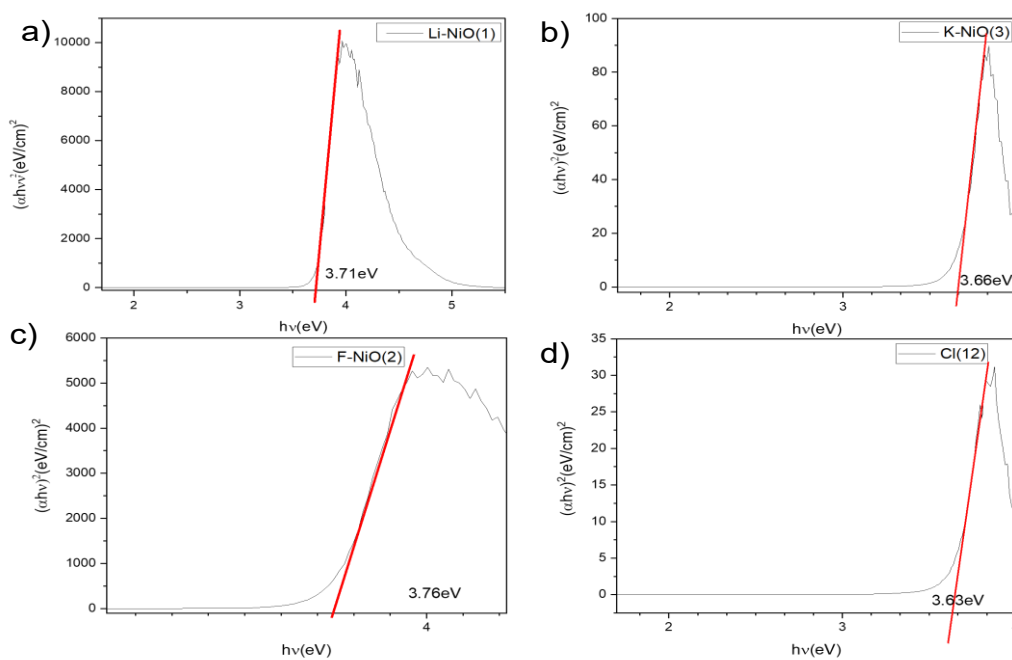

**Figure S6.** Tauc plot of 1 wt. % doped a) Li:NiO<sub>x</sub> b) K:NiO<sub>x</sub> c) F:NiO<sub>x</sub> and d) Cl:NiO<sub>x</sub>.

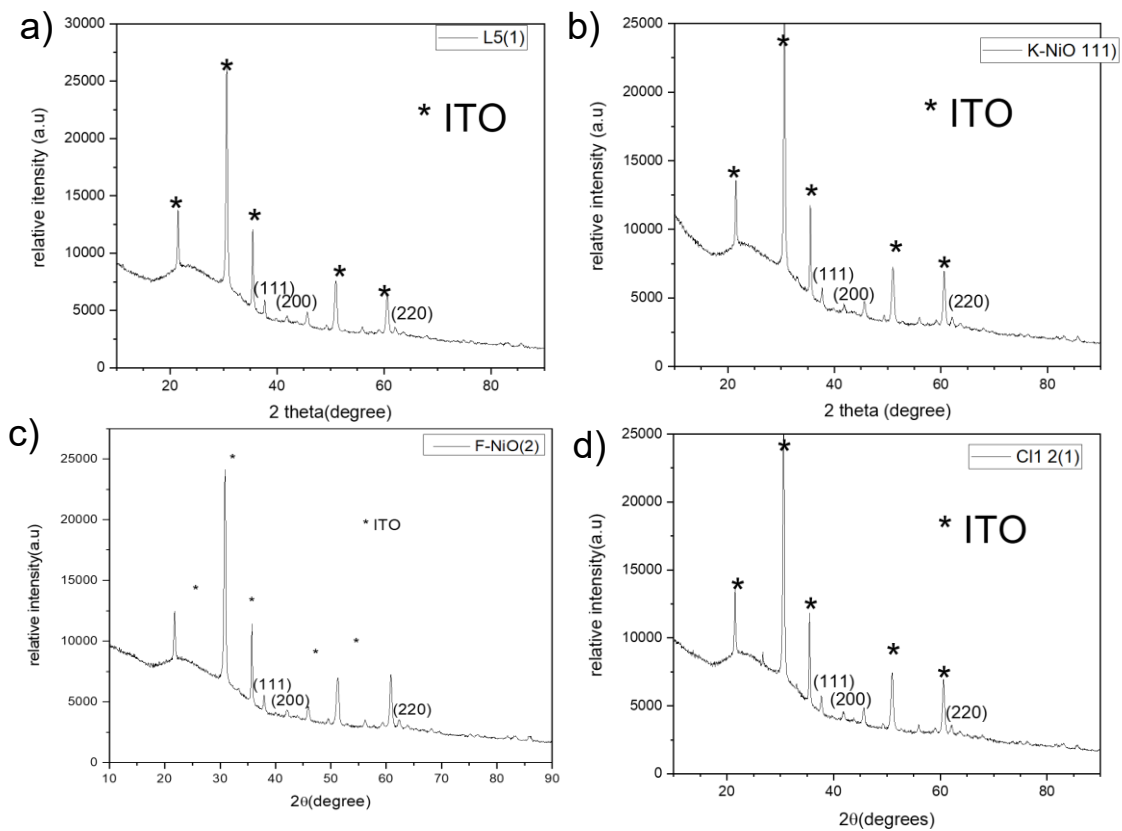

**Figure S7.** XRD plot of 1 wt. % doped a) Li: $\text{NiO}_x$  b) K: $\text{NiO}_x$  c) F: $\text{NiO}_x$  and d) Cl: $\text{NiO}_x$ .

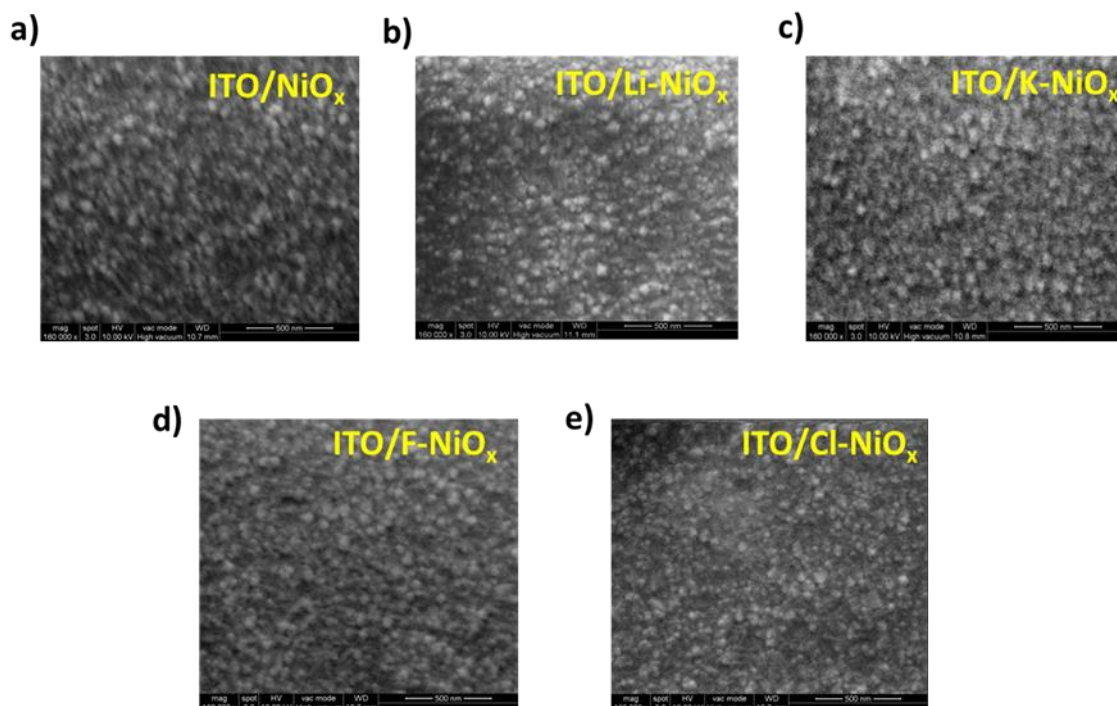

**Fig.S8.** SEM images of a) undoped  $\text{NiO}_x$  b) Li: $\text{NiO}_x$  c) K: $\text{NiO}_x$  d) F: $\text{NiO}_x$  and e) Cl: $\text{NiO}_x$

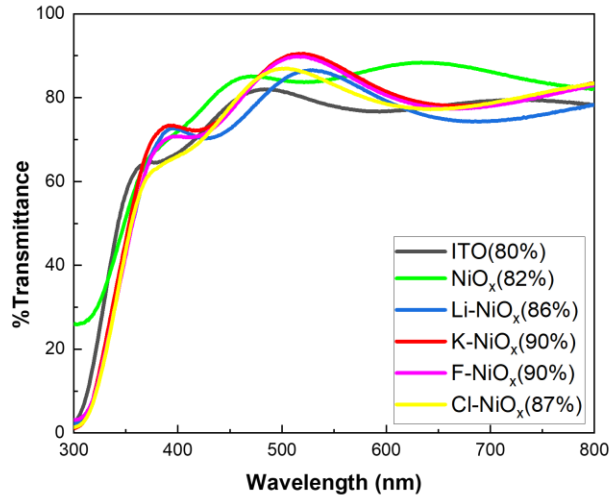

**Figure S9.** % Transmittance plots of undoped and 5 wt. % doped NiO<sub>x</sub> thin films.

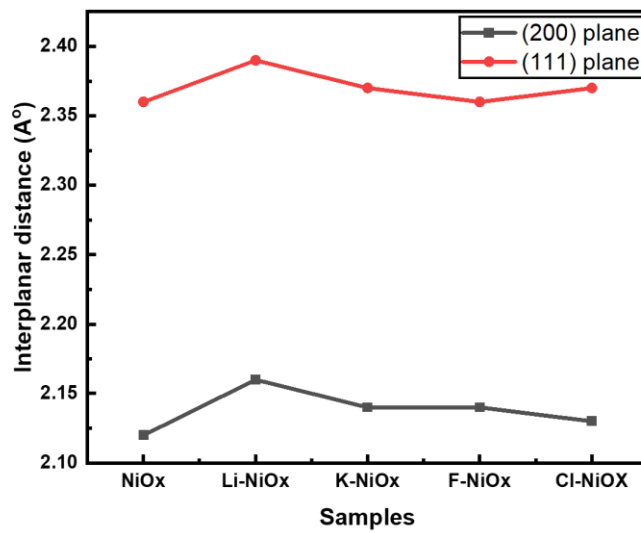

**Fig. S10.** Plot of interplanar spacing in undoped and 5 wt. % doped NiO<sub>x</sub>

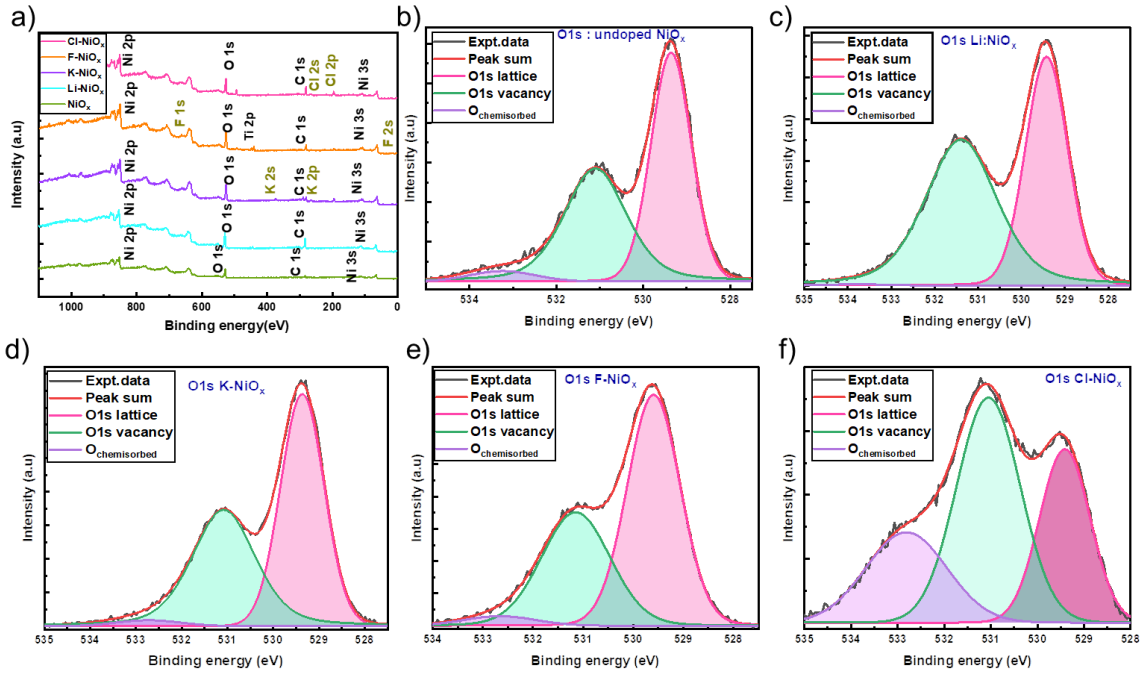

**Fig. S11.** a) XPS survey scan for undoped and doped NiO<sub>x</sub> samples. O1s deconvoluted spectra for b) NiO<sub>x</sub> c) Li:NiO<sub>x</sub> d) K:NiO<sub>x</sub> e) F:NiO<sub>x</sub> and f) Cl:NiO<sub>x</sub>.

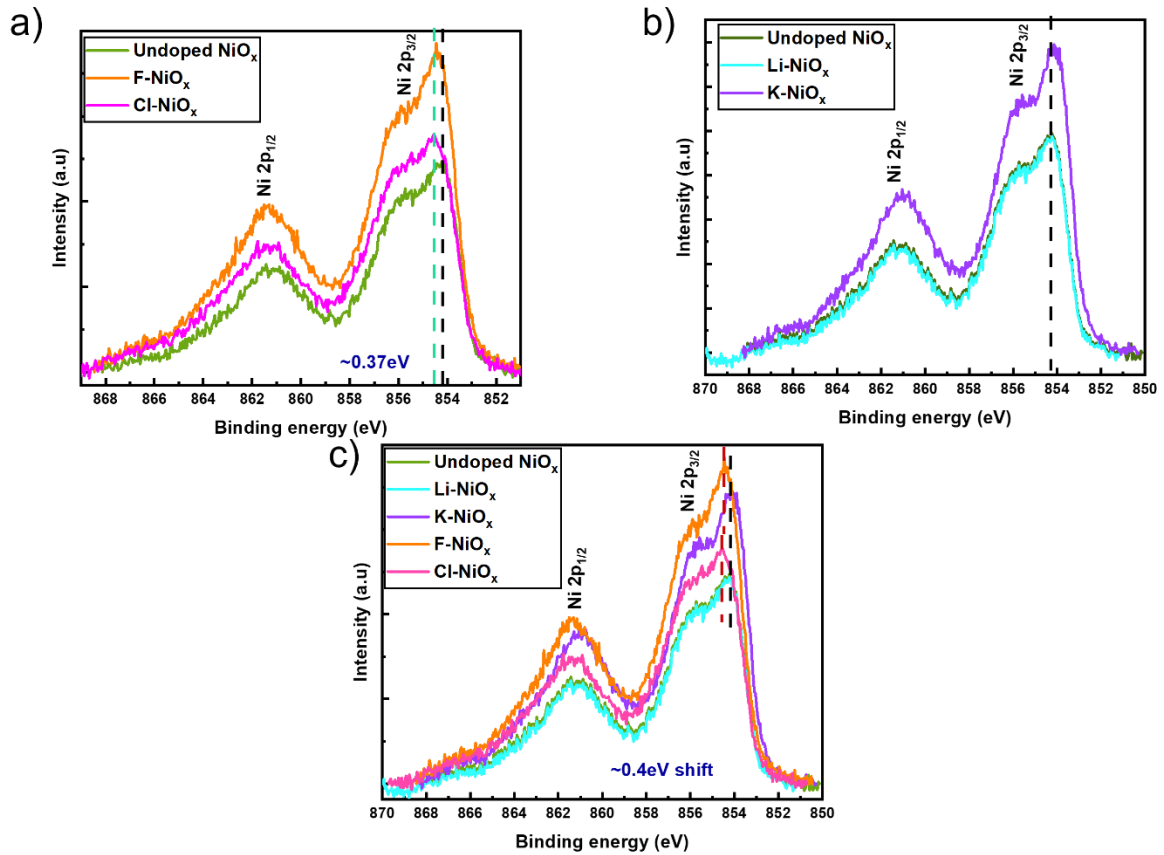

**Fig. S12.** Peak shift analysis of a) undoped NiO<sub>x</sub> and F and Cl-doped NiO<sub>x</sub> thin films b) undoped NiO<sub>x</sub> and Li and K-doped NiO<sub>x</sub> thin films and c) Correlative analysis of peak shift in undoped and doped NiO<sub>x</sub> thin films.

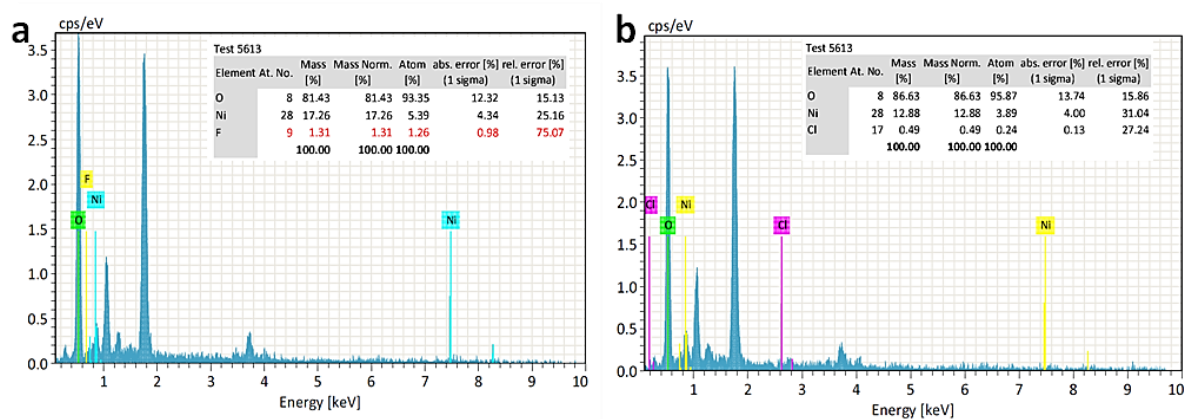

**Fig. S13.** EDS spectra of a) F:NiO<sub>x</sub> and b) Cl:NiO<sub>x</sub>

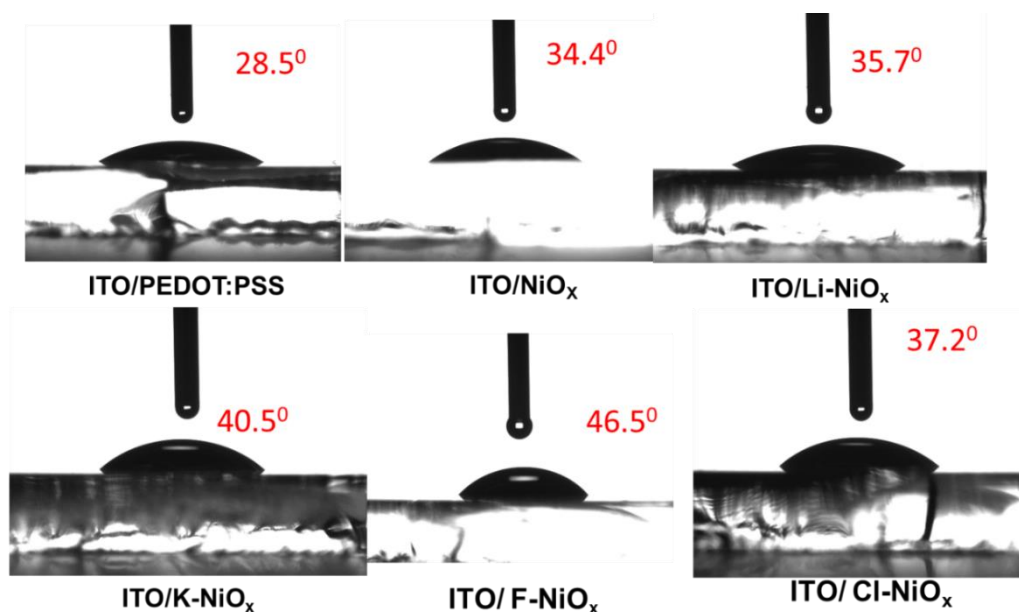

**Fig. S14.** Water contact angle on PEDOT:PSS, doped and undoped NiO<sub>x</sub> thin films.



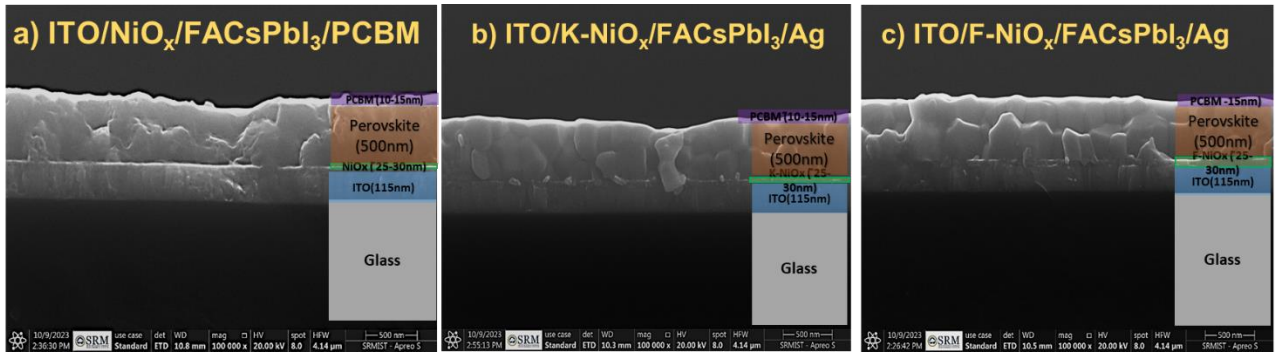

**Fig. S15.** Cross-section images of FACsPbI<sub>3</sub> absorber on a) NiO<sub>x</sub> b) K:NiO<sub>x</sub> and c) F:NiO<sub>x</sub>.

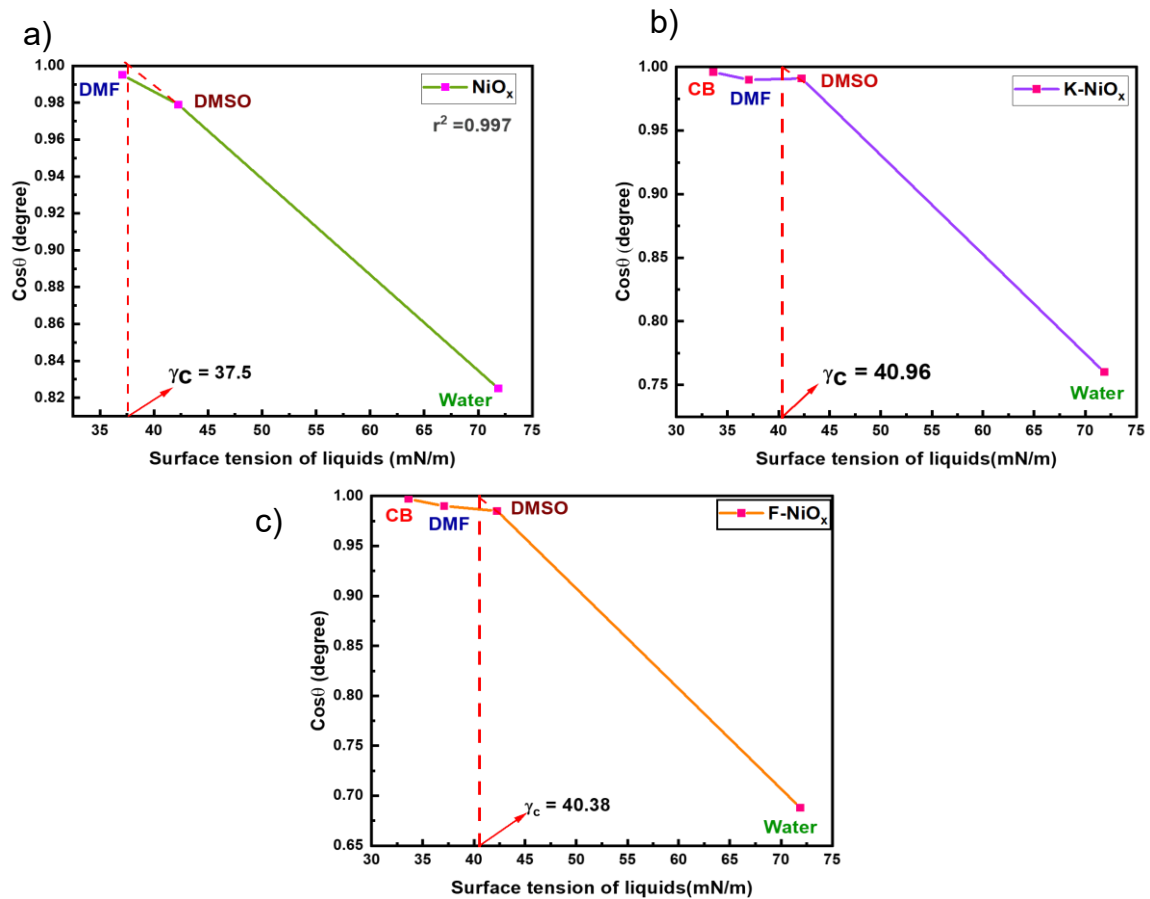

**Fig. S16.** Zisman plot of a) NiO<sub>x</sub> b) K:NiO<sub>x</sub> and c) F:NiO<sub>x</sub>.

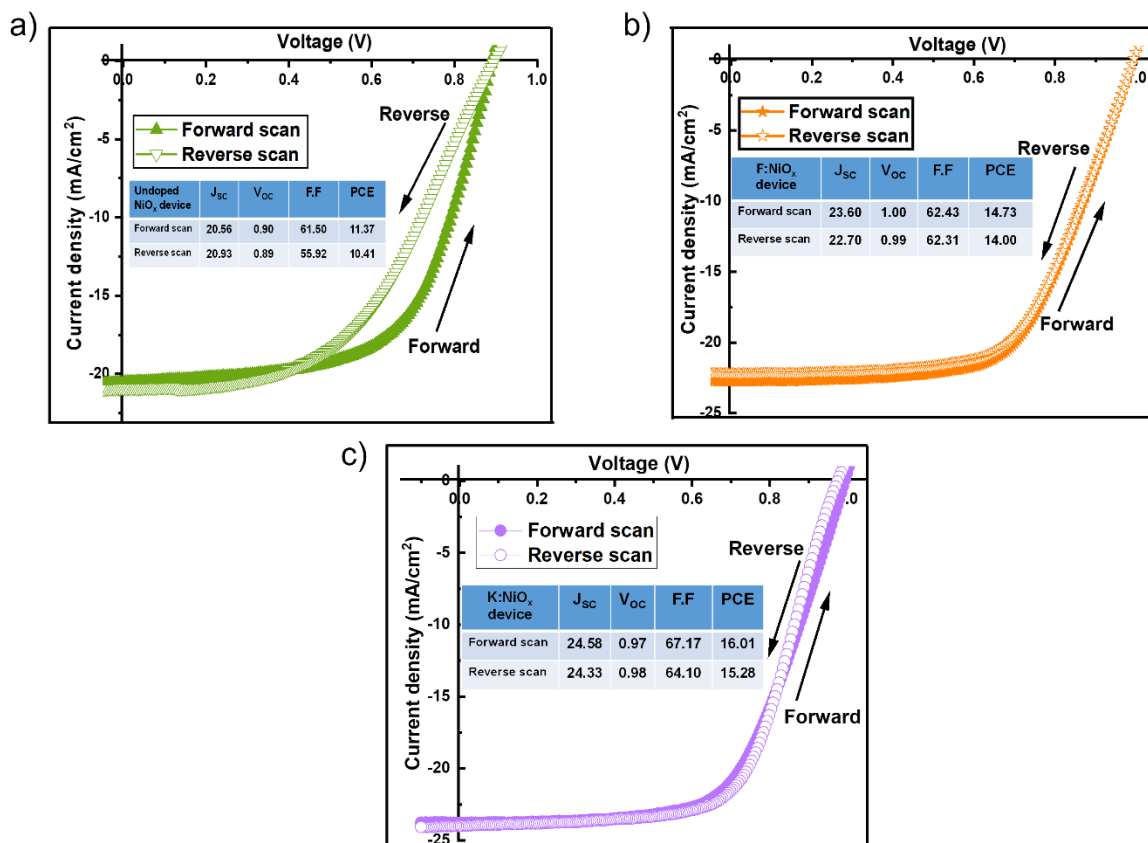

**Fig. S17.** Forward and reverse scan of J-V data for a) undoped NiO<sub>x</sub> b) F:NiO<sub>x</sub> and c) K:NiO<sub>x</sub> devices. A Keithley 2400 source meter was used for the current-voltage scan by applying an external voltage bias and measuring the response current with a scan rate of 120 mV s<sup>-1</sup> under reverse and forward scan conditions. The devices were not subjected to any preconditioning techniques before to the measurement, such as applying a forward voltage bias or performing extended light soaking.

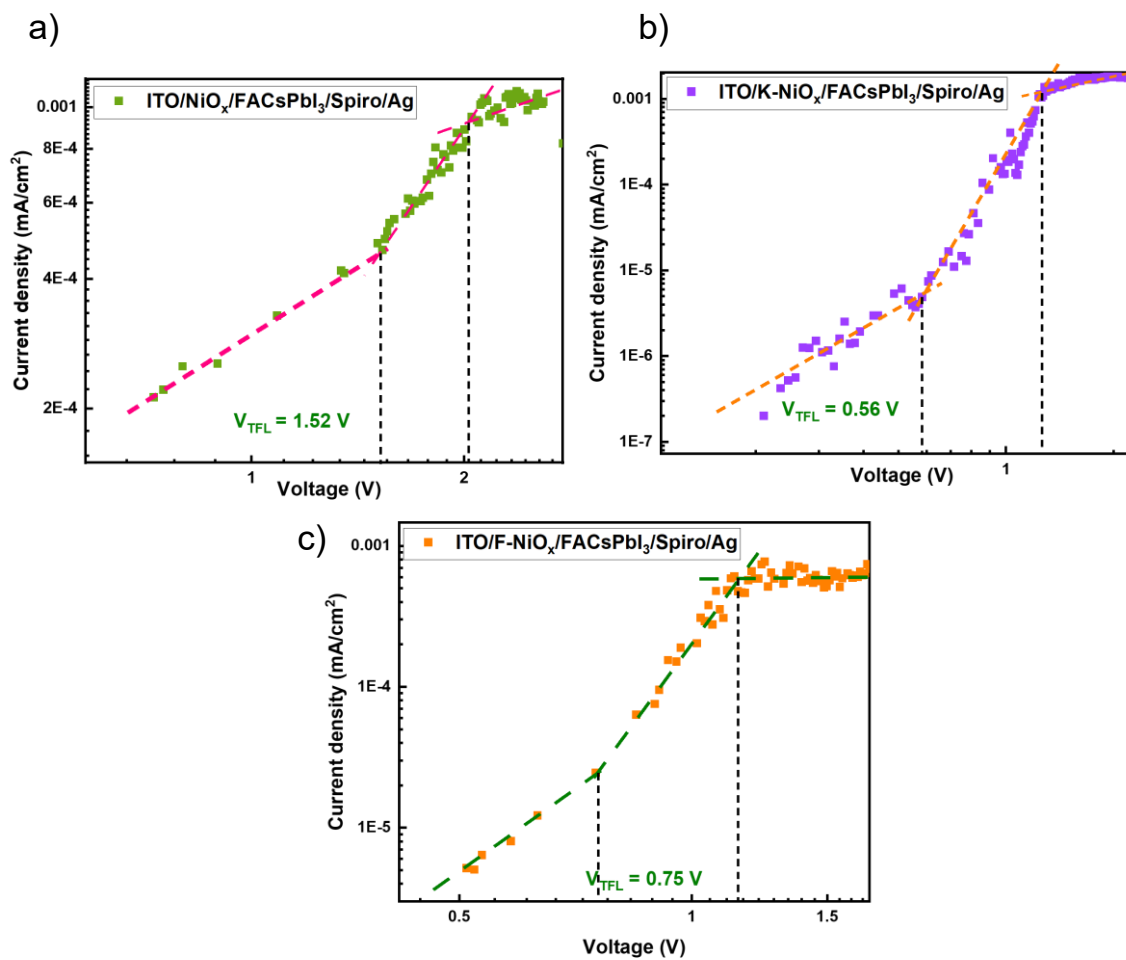

**Fig. S18.** SCLC plot for a) undoped NiO<sub>x</sub> b) K-doped NiO<sub>x</sub> and c) F-doped NiO<sub>x</sub> based hole only devices

**Table S1.** % WAT values of doped and undoped NiO<sub>x</sub> thin films

| <b>Sample</b>       | <b>% WAT</b> |
|---------------------|--------------|
| ITO                 | 83.85 %      |
| NiO <sub>x</sub>    | 74.30 %      |
| Li:NiO <sub>x</sub> | 77.31 %      |
| K:NiO <sub>x</sub>  | 75.34 %      |
| F:NiO <sub>x</sub>  | 80.07 %      |
| Cl:NiO <sub>x</sub> | 75.13 %      |

**Table S2.** Peak fitting parameters for**a) Undoped NiO<sub>x</sub>**

| <b>Peak</b>                     | <b>Peak position</b> | <b>FWHM</b> | <b>Peak area</b> | <b>χ<sup>2</sup></b> | <b>Ni<sup>3+</sup>/Ni<sup>2+</sup> ratio</b> |
|---------------------------------|----------------------|-------------|------------------|----------------------|----------------------------------------------|
| Ni <sup>2+</sup>                | 854.13               | 1.36        | 10016.20         | 1.54                 | 0.90                                         |
| Ni <sup>3+</sup> shoulder peak  | 855.86               | 3.0         | 9045.54          |                      |                                              |
| Ni <sup>2+</sup> satellite peak | 861.02               | 3.23        | 10839.41         |                      |                                              |
| Ni <sup>3+</sup> satellite peak | 863.37               | 4.28        | 3502.31          |                      |                                              |

**b) Li:NiO<sub>x</sub>**

| Peak                            | Peak position | FWHM | Peak area | $\chi^2$ | Ni <sup>3+</sup> /Ni <sup>2+</sup> ratio |
|---------------------------------|---------------|------|-----------|----------|------------------------------------------|
| Ni <sup>2+</sup>                | 853.95        | 1.33 | 6226.81   | 1.29     | 3.10                                     |
| Ni <sup>3+</sup> shoulder peak  | 855.64        | 3.05 | 19352.34  |          |                                          |
| Ni <sup>2+</sup> satellite peak | 860.91        | 3.90 | 14767.49  |          |                                          |
| Ni <sup>3+</sup> satellite peak | 864.26        | 4.59 | 3069.81   |          |                                          |

**c) K:NiO<sub>x</sub>**

| Peak                            | Peak position | FWHM | Peak area | $\chi^2$ | Ni <sup>3+</sup> /Ni <sup>2+</sup> ratio | Wt. % of dopant found in sample |
|---------------------------------|---------------|------|-----------|----------|------------------------------------------|---------------------------------|
| Ni <sup>2+</sup>                | 853.93        | 1.28 | 2414.32   | 1.38     | 3.27                                     | 1.56                            |
| Ni <sup>3+</sup> shoulder peak  | 855.64        | 3.18 | 7826.21   |          |                                          |                                 |
| Ni <sup>2+</sup> satellite peak | 860.91        | 3.80 | 4967.95   |          |                                          |                                 |
| Ni <sup>3+</sup> satellite peak | 864.26        | 6.21 | 3132.94   |          |                                          |                                 |

**d) F:NiO<sub>x</sub>**

| Peak                            | Peak position | FWHM | Peak area | $\chi^2$ | Ni <sup>3+</sup> /Ni <sup>2+</sup> ratio | Wt. % of dopant found in sample |
|---------------------------------|---------------|------|-----------|----------|------------------------------------------|---------------------------------|
| Ni <sup>2+</sup>                | 854.22        | 1.31 | 5686.78   | 1.13     | 3.83                                     | 0.41                            |
| Ni <sup>3+</sup> shoulder peak  | 855.78        | 3.24 | 19849.70  |          |                                          |                                 |
| Ni <sup>2+</sup> satellite peak | 861.19        | 4.08 | 20038.58  |          |                                          |                                 |
| Ni <sup>3+</sup> satellite peak | 864.32        | 4.86 | 3121.85   |          |                                          |                                 |

e) Cl:NiO<sub>x</sub>

| Peak                            | Peak position | FWHM | Peak area | $\chi^2$ | Ni <sup>3+</sup> /Ni <sup>2+</sup> ratio | Wt. % of dopant found in sample |
|---------------------------------|---------------|------|-----------|----------|------------------------------------------|---------------------------------|
| Ni <sup>2+</sup>                | 854.23        | 1.42 | 4249.77   | 1.24     | 3.49                                     | 2.07                            |
| Ni <sup>3+</sup> shoulder peak  | 855.86        | 3.32 | 16315.03  |          |                                          |                                 |
| Ni <sup>2+</sup> satellite peak | 861.14        | 3.88 | 10670.18  |          |                                          |                                 |
| Ni <sup>3+</sup> satellite peak | 863.34        | 6.36 | 5542.51   |          |                                          |                                 |

**Table S3.** Crystallite size of FA<sub>0.9</sub>Cs<sub>0.1</sub>PbI<sub>3</sub> absorber on doped and undoped NiO<sub>x</sub> HTL.

| Thin film sample                                  | Interplanar spacing (Å) | Crystallite size (nm) |
|---------------------------------------------------|-------------------------|-----------------------|
| 1) Undoped NiO <sub>x</sub> /FACsPbI <sub>3</sub> | 6.15                    | 62.2                  |
| 2) K-NiO <sub>x</sub> /FACsPbI <sub>3</sub>       | 6.17                    | 87.7                  |
| 3) F-NiO <sub>x</sub> /FACsPbI <sub>3</sub>       | 6.20                    | 109.1                 |

**Table S4.** Surface energy values of doped and undoped NiO<sub>x</sub> HTL.

| Thin film sample            | Surface energy (mJ/m <sup>2</sup> ) |
|-----------------------------|-------------------------------------|
| 1) Undoped NiO <sub>x</sub> | 37.50                               |
| 2) Li:NiO <sub>x</sub>      | 38.74                               |
| 3) K:NiO <sub>x</sub>       | 40.96                               |
| 4) F:NiO <sub>x</sub>       | 40.38                               |
| 5) Cl:NiO <sub>x</sub>      | 40.90                               |
